# Supplementary material
Source: PubMed Central journal article supplement (PMC4791695)
Supplement: eye2015238x1.pdf [file eye2015238x1.pdf]

# Fundoscopy OSCE mark sheet

Participant's candidate number \_\_\_\_\_

| Direct ophthalmoscopy technique checklist (point value in brackets)           | Done Correctly (✓) |
|-------------------------------------------------------------------------------|--------------------|
| Introduces self, gains consent (1)                                            | _____              |
| Uses right eye/hand to examine patient's right eye (and vice versa) (3)       | _____              |
| Turns ophthalmoscope on (1)                                                   | _____              |
| Checks beam size and brightness (1)                                           | _____              |
| Begins ~40 cm from patient at 15° lateral to the patient's line of vision (1) | _____              |
| Advises patient to fixate on a spot on the wall (1)                           | _____              |
| Keeps both eyes open while examining the patient (1)                          | _____              |
| Finds the red reflex and follows it in (2)                                    | _____              |
| Appropriate proximity to the patient (3)                                      | _____              |
| Focuses the ophthalmoscope (3)                                                | _____              |
| Focuses on optic disc (3)                                                     | _____              |
| Follows vessels from disc (2)                                                 | _____              |
| Focuses on macula (2)                                                         | _____              |

General impression: Exceeds requirements of a graduating medical student  
Satisfies requirements  
Does not satisfy requirements
